# Supplementary material
Source: PubMed Central journal article supplement (PMC7406268)
Supplement: jciinsight-5-134749-s089.pdf [file jciinsight-5-134749-s089.pdf]

## Supplemental Information

### **Monocyte upregulation of podoplanin during early sepsis induces complement inhibitor release to protect liver function**

Zhanli Xie<sup>1</sup>, Bojing Shao<sup>2</sup>, Christopher Hoover<sup>2,5</sup>, Michael McDaniel<sup>2</sup>  
Jianhua Song<sup>2</sup>, Miao Jiang<sup>1</sup>, Zhenni Ma<sup>1</sup>, Fei Yang<sup>1</sup>, Jingjing Han<sup>1</sup>, Xia Bai<sup>1,3,4</sup>, Changgeng  
Ruan<sup>1,3,4</sup>, Lijun Xia<sup>2,1,3,5</sup>

**Corresponding author:** Lijun Xia, M.D., Ph.D., Cardiovascular Biology Research Program,  
Oklahoma Medical Research Foundation, 825 N.E. 13th Street, Oklahoma City, OK 73104.  
Phone: 405-271-7892. Fax: 405-271-3137. Email: [lijun-xia@omrf.org](mailto:lijun-xia@omrf.org)

#### **This PDF file includes:**

Method  
References  
Supplemental Figs. 1 to 15

## Method

*Isolation of monocytes from mice.* Anti-coagulated mouse blood was collected via cardiac puncture and was diluted (1:1) with Dulbecco's PBS without calcium and magnesium. Mouse monocytes are defined as CD11b<sup>high</sup> (CD90/B220/CD49b/NK1.1/Ly6G/Ter-119)<sup>low</sup> (1, 2). Collect mononuclear cells by Ficcol gradient centrifugation at 400g for 30min. Add antibody mix containing PE-labeled B220 (CD45R), CD49b, CD90, Ly6G, NK1.1 and Ter-119, and incubate for 10min at room temperature. After wash with PBS (2mM EDTA, 2% FBS), the cells are magnetically labeled with Anti PE Mcirobeads (4°C, 15min). The cell suspension was loaded on a MACS Column which is placed in the magnetic field of a MACS Separator. The magnetically labeled cells are absorbed in the column while the unlabeled cells run through. Collect the unlabeled cells and labeled with APC-labeled CD11b.

## References:

1. Swirski FK, et al. Identification of splenic reservoir monocytes and their deployment to inflammatory sites. *Science*. 2009;325(5940):612-6.
2. Yang A, et al. An essential role of high-molecular-weight kininogen in endotoxemia. *J Exp Med*. 2017;214(9):2649-70.

## Supplemental Figures

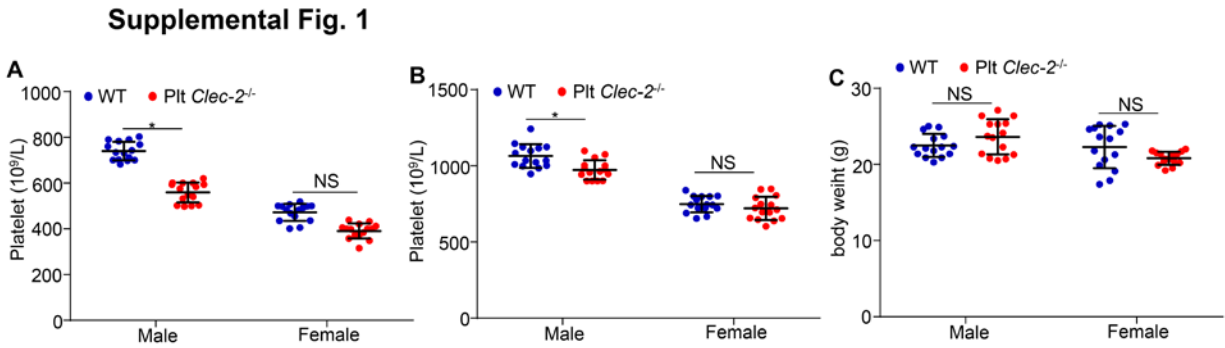

**Supplemental Figure 1. Deficiency of platelet CLEC-2 does not affect platelet count and body weight of female mice.** Peripheral blood from mice lacking platelet CLEC-2 (Plt *Clec-2*<sup>-/-</sup>) and their littermate controls (WT) was collected, and platelet count was measured with (A) Hemavet<sup>®</sup> or (B) flow cytometry. (C) Body weight of WT and Plt *Clec-2*<sup>-/-</sup> mice were measured. Data represent mean  $\pm$  sd. n = 15 mice/group. \**P* < 0.05. Data were analyzed using an unpaired Student's t test and were representative of four independent experiments.

**Supplemental Fig. 2**

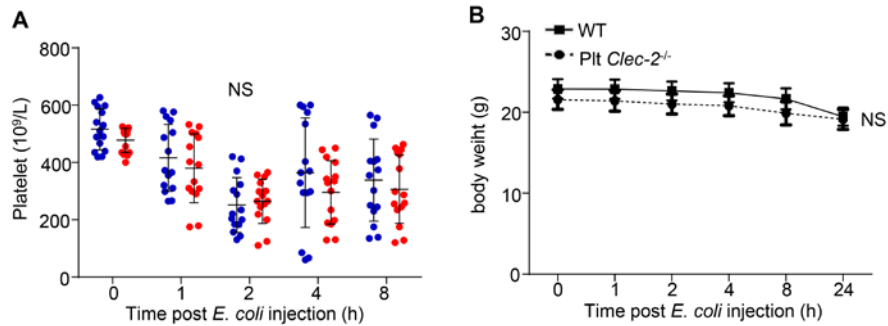

**Supplemental Figure 2. Deficiency of platelet CLEC-2 does not affect *E. coli*-induced changes of platelet count and body weight.** Female WT and Plt *Clec-2*<sup>-/-</sup> mice were injected i.p. with a half lethal dose of *E. coli* ( $2 \times 10^7$  CFU/mouse). (A) Peripheral blood was collected before infection and at different time points after infection, and platelet count was measured with Hemavet<sup>®</sup>. (B) Body weight of the same mice was measured. Data represent mean  $\pm$  sd. n = 15 mice/group. Data were analyzed using a one-way ANOVA followed by a Tukey's test for multiple groups and were representative of three independent experiments.

### Supplemental Fig. 3

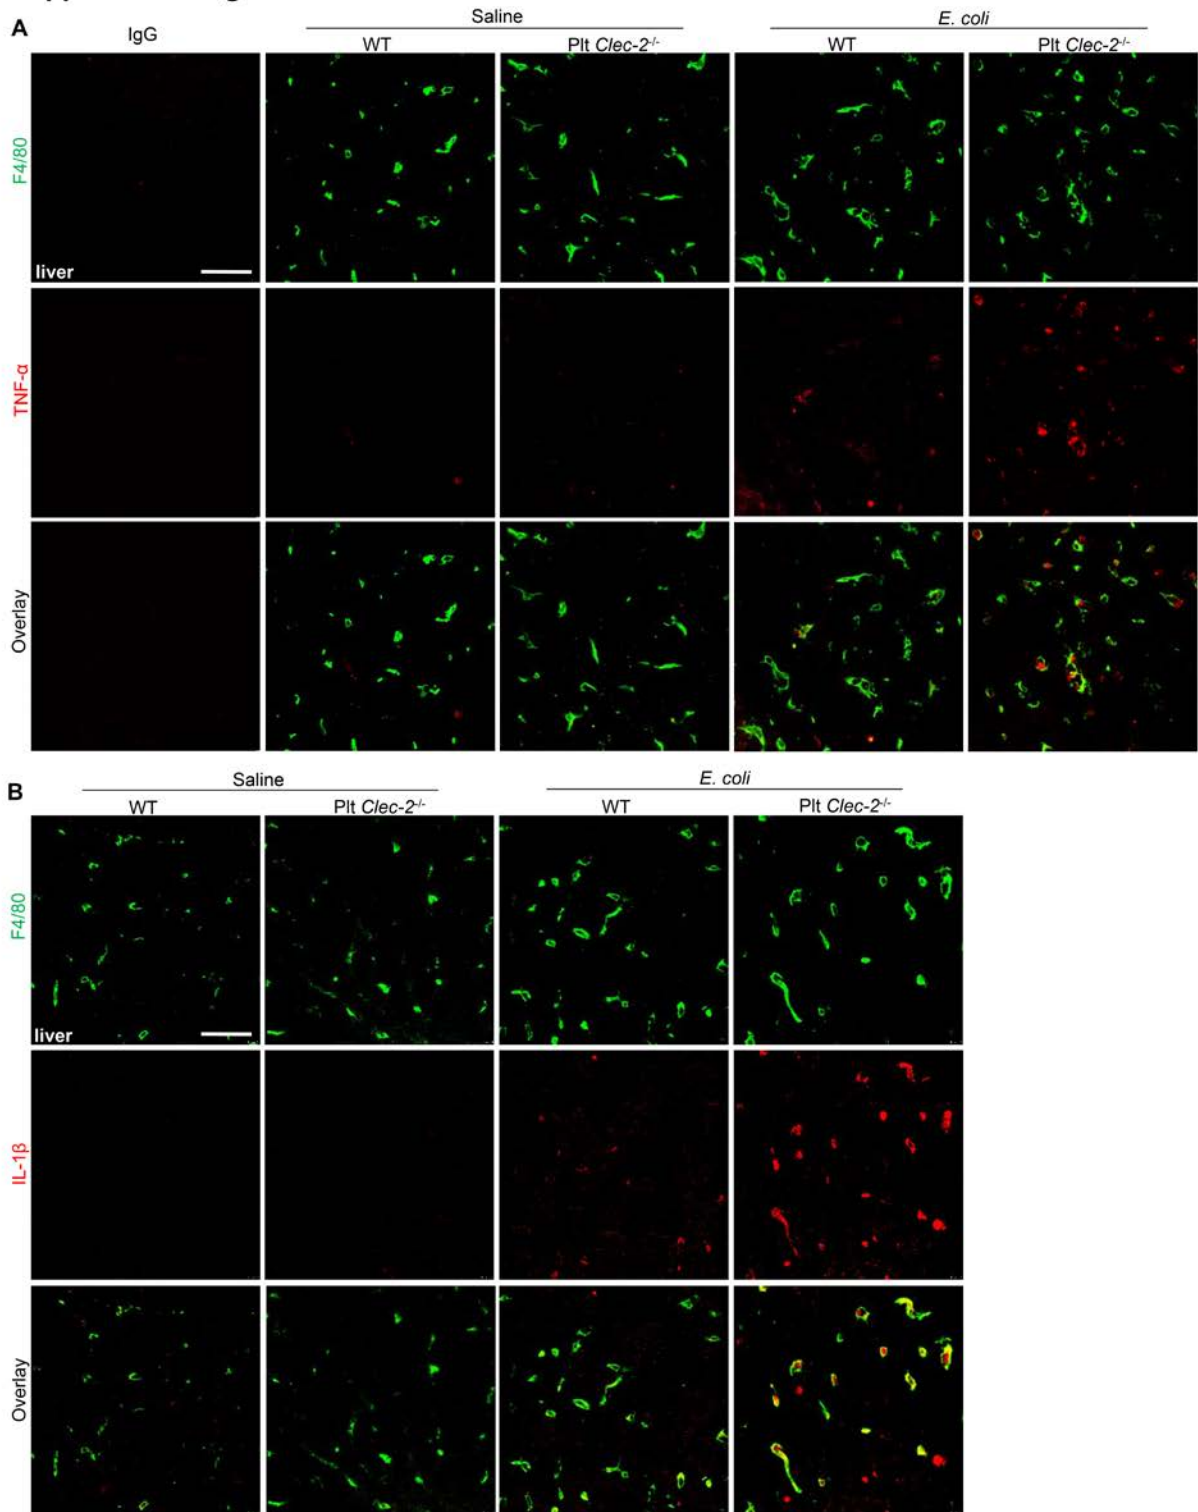

**Supplemental Figure 3. Platelet CLEC-2 deficiency increases liver inflammation in early sepsis.** (A - B) Representative immunofluorescent images of liver cryosections of WT and Plt *clec-2*<sup>-/-</sup> mice at 8 h post injection of saline or *E. coli*, *n*= 6 mice/group. Scale bar, 10 μm. Data were representative of three independent experiments.

**Supplemental Fig. 4**

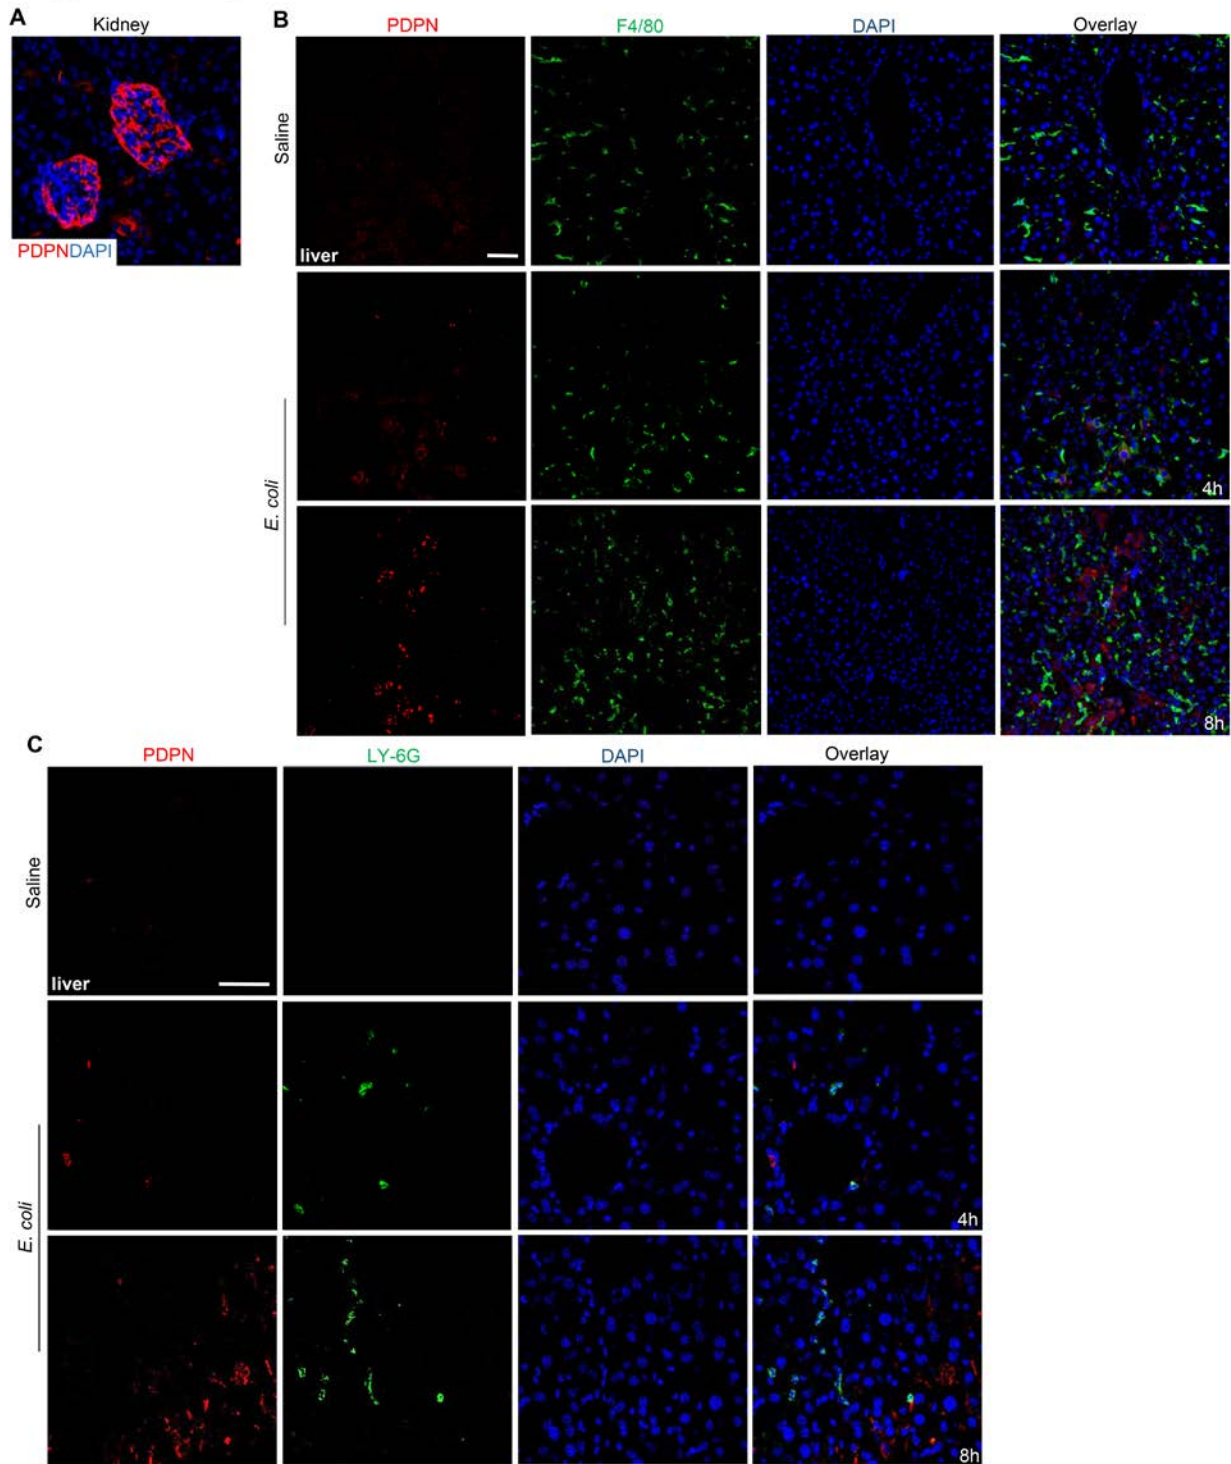

**Supplemental Figure 4. Antibodies stain podoplanin in kidney and liver.** Representative images of (A) the kidney from healthy WT mice and (B - C) the liver from WT mice at 4 h and 8



h post injection of saline or *E. coli*. n = 5 mice/group. Scale bar, 25  $\mu\text{m}$  (B) and 10  $\mu\text{m}$  (C). Data were representative of three independent experiments.

**Supplemental Fig. 5**

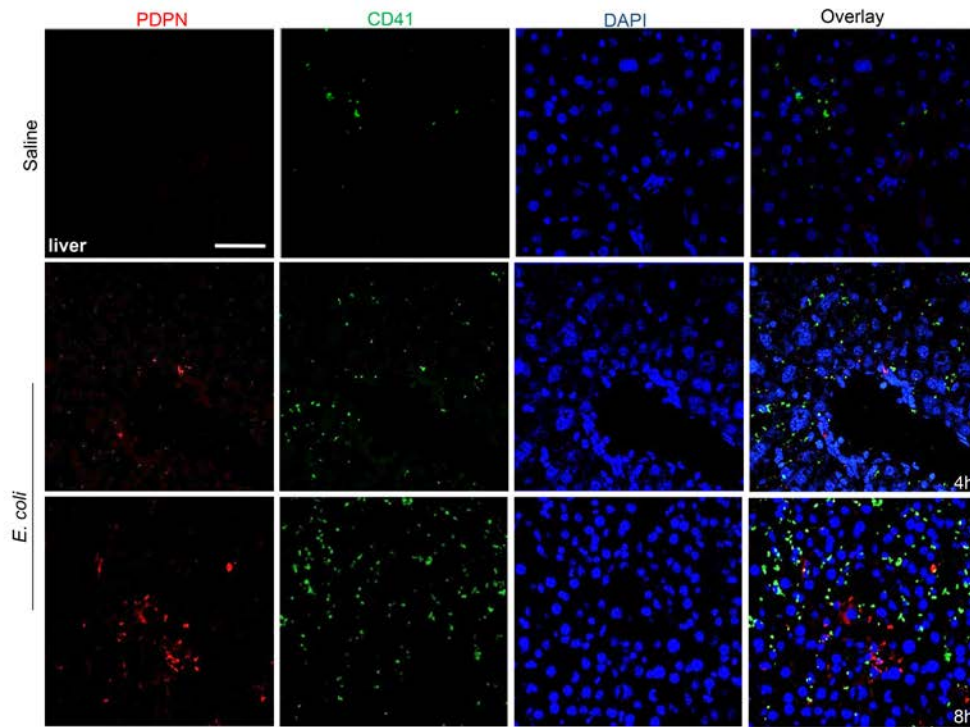

**Supplemental Figure 5. Platelet enrichment in septic liver.** Representative images of the liver from saline-injected WT mice or WT mice at 4 h and 8 h post injection *E. coli*. n = 5 mice/group. Scale bar, 10  $\mu$ m. Data were representative of three independent experiments.

**Supplemental Fig. 6**

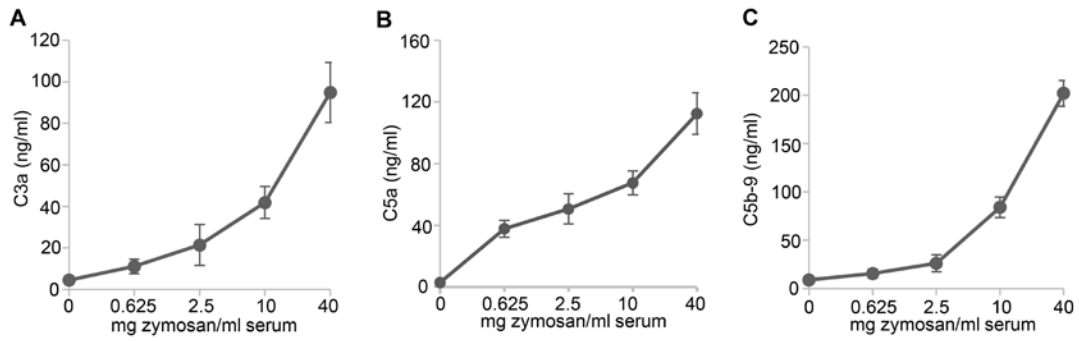

**Supplemental Figure 6. Zymosan induces complement activation in a dose-dependent manner.** The serum of WT mice was treated with different doses of zymosan and the complement activation products were measured. n = 6 mice/group. Data are mean  $\pm$  sd. Data were representative of three independent experiments.

**Supplemental Fig. 7**

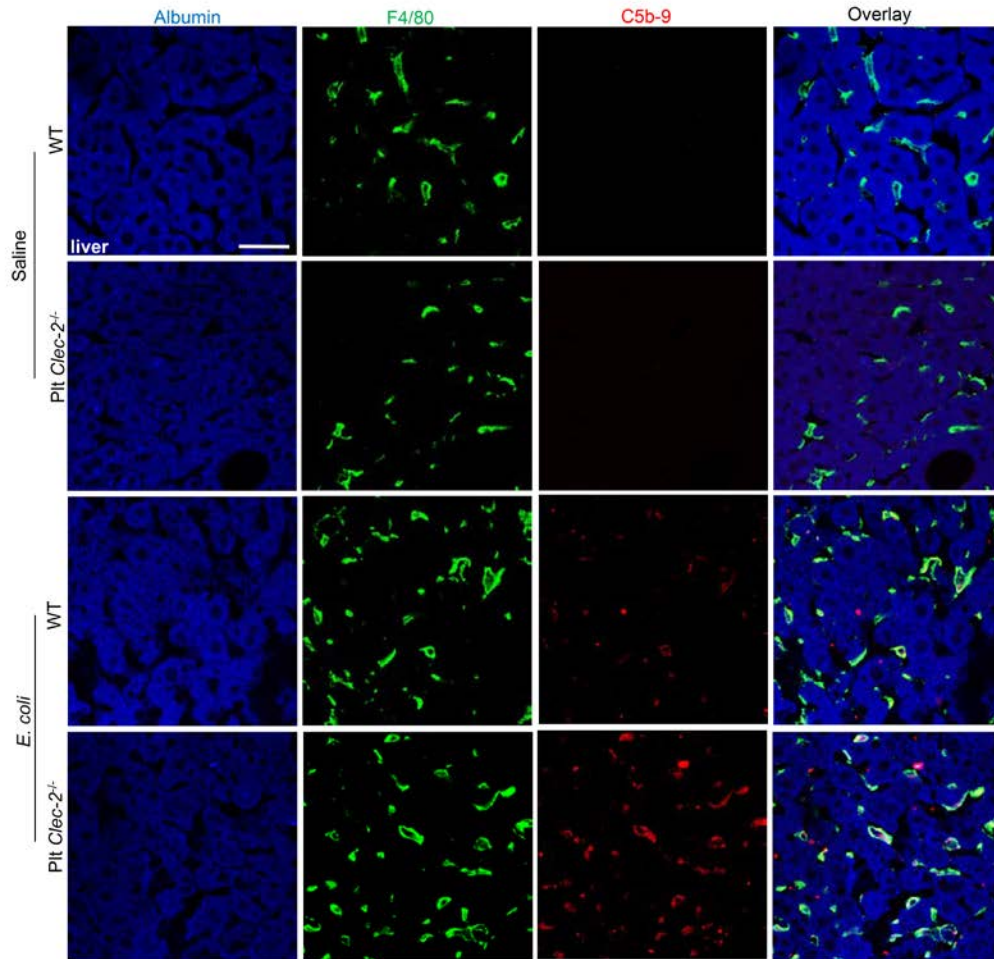

**Supplemental Figure 7. Platelet CLEC-2 deficiency increases complement liver attack in early sepsis.** Representative images of C5b-9 complex staining of liver cryosections at 8 h after injection of *E. coli* or saline. n = 6 mice/group. Scale bar, 10  $\mu$ m. Data were representative of three independent experiments.

Supplemental Fig. 8

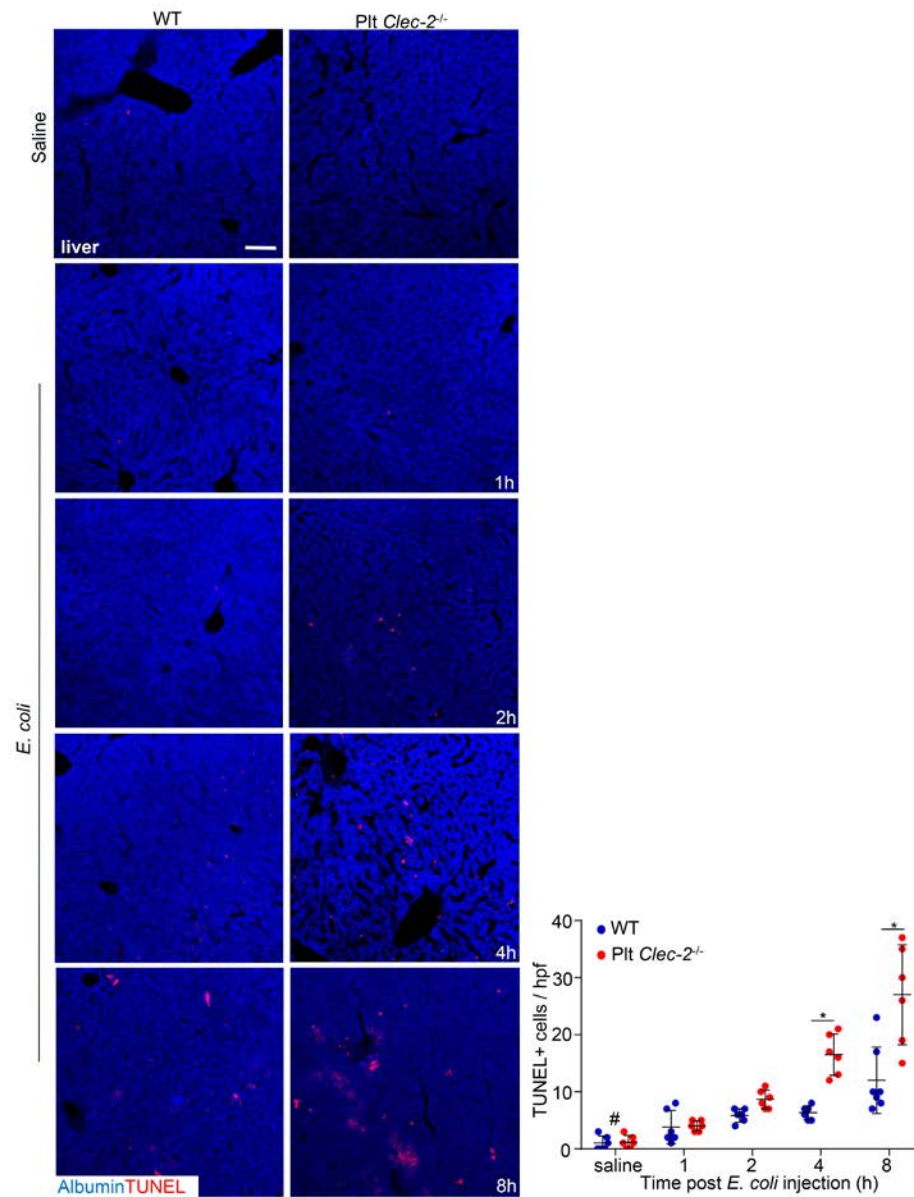

**Supplemental Figure 8. Platelet CLEC-2 deficiency increases cell apoptotic death in the liver.** Representative images of TUNEL staining of liver cryosections. Bar graphs below were quantifications of TUNEL positive cells. Hpf, high-power microscopic fields. The data are mean  $\pm$  sd. n = 6 mice/group. \* $P < 0.05$ . \*\* $P < 0.01$ . \*\*\* $P < 0.001$ . Scale bar, 25  $\mu$ m. Data were analyzed using a one-way ANOVA followed by a Tukey's test for multiple groups and were representative of three independent experiments.

## Supplemental Fig. 9

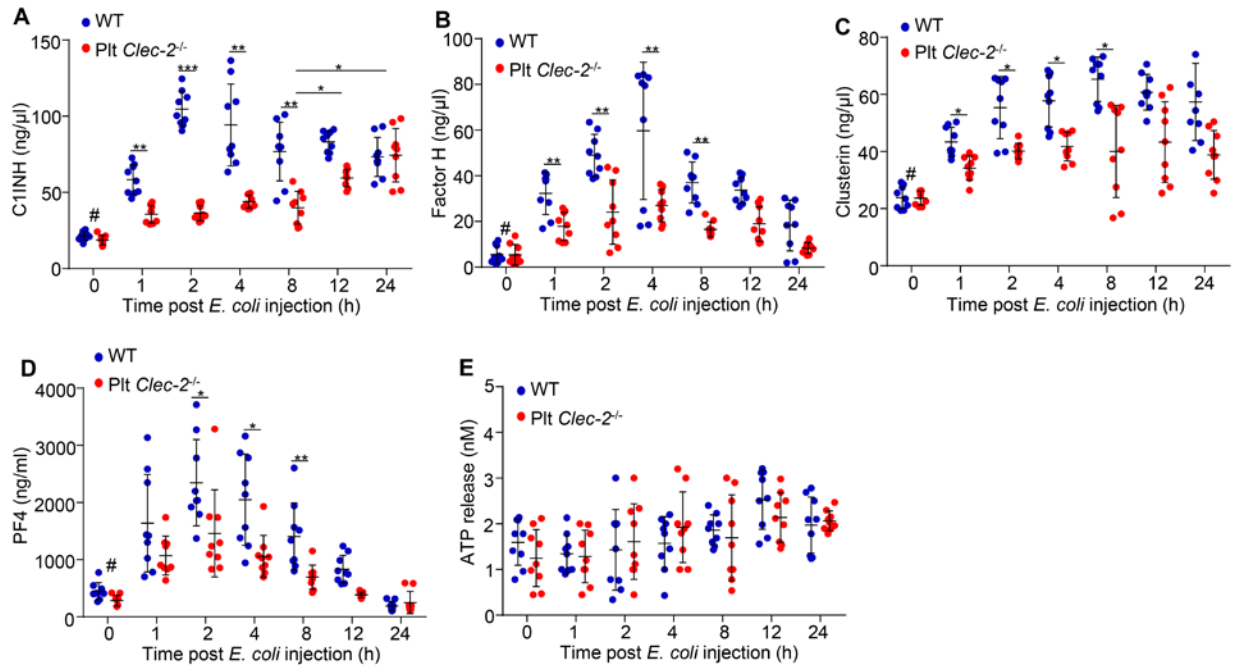

**Supplemental Figure 9. Platelet CLEC-2 deficiency reduces release of complement inhibitors from platelets in early sepsis.** (A - E) Plasma levels of different complement inhibitors, PF4, and ATP of WT and Plt *Clec-2*<sup>-/-</sup> mice with or without *E. coli* injection. The data represent mean  $\pm$  sd, n = 9 mice/group. #*P* < 0.05, comparing the sample at 0 h of *E. coli* injection with samples at other time points after *E. coli* infection. \**P* < 0.05. \*\**P* < 0.01. \*\*\**P* < 0.001. Data were analyzed using a one-way ANOVA followed by a Tukey's test for multiple groups and were representative of three independent experiments.

**Supplemental Fig. 10**

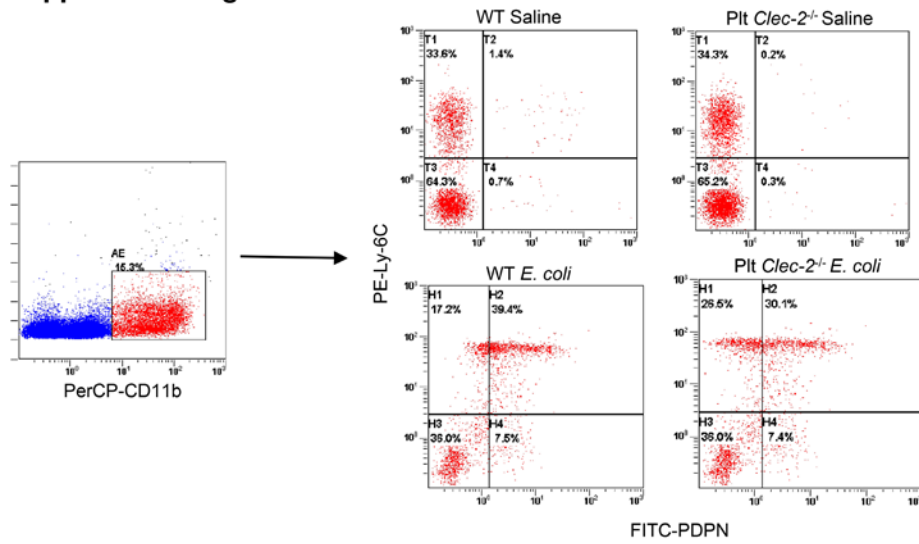

**Supplemental Figure 10. Flow chart for measuring podoplanin expression on circulating**

**monocytes with flow cytometry.** Peripheral blood was collected from WT and Plt *Clec-2*<sup>-/-</sup> mice at 1 h post injection i.p. of saline or *E. coli* ( $2 \times 10^7$  CFU/mouse). After lysis of red blood cells, the blood samples were incubated with different fluorophore-conjugated antibodies to CD11b, Ly-6C, and podoplanin. White blood cells were distinguished by the size scatter, and then CD11b-positive cell population was selected. The selected cell population was analyzed for expression of Ly-6C and podoplanin. Ly-6C-positive cells, on top of the positive expression of CD11b, were monocytes. In Ly-6C-positive cells, podoplanin-positive cells were further analyzed. The representative data from three independent experiments were shown.  $n = 6$  mice/group. Data were representative of three independent experiments.

**Supplemental Fig. 11**

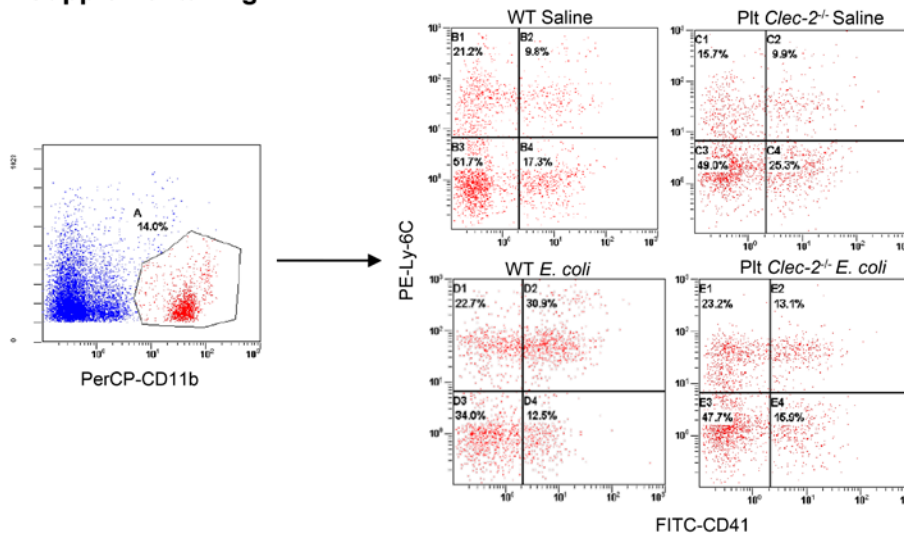

**Supplemental Figure 11. Flow chart for measuring the platelet-monocyte aggregate with flow cytometry.** Peripheral blood was collected from WT and *Plt Clec-2<sup>-/-</sup>* mice at 1 h post injection i.p. of saline or *E. coli* ( $2 \times 10^7$  CFU/mouse). After lysis of red blood cells, the blood samples were incubated with different fluorophore-conjugated antibodies to CD11b, Ly-6C, and CD41. White blood cells were distinguished by the size scatter, and then CD11b-positive cell population was selected. The selected cell population was analyzed for expression of Ly-6C and CD41. Ly-6C-positive cells, on top of the positive expression of CD11b, were monocytes. In Ly-6C-positive cells, CD41-positive cells were platelet-monocyte aggregates. The representative data from three independent experiments were shown.  $n = 6$  mice/group. Data were representative of three independent experiments.



**Supplemental Fig. 12**

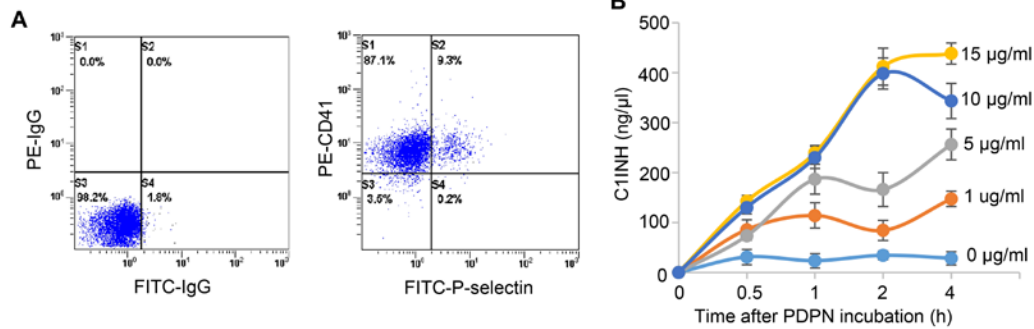

**Supplemental Figure 12. Binding of podoplanin induces a fast and dose-dependent release of complement inhibitor from platelets.** Platelets were isolated from peripheral blood of WT mice, and resuspended in modified Tyrode's buffer at a concentration of  $1 \times 10^5/\mu\text{l}$ . (A) The platelets were incubated with different fluorophore-conjugated antibodies to CD41 and P-selectin. (B) Platelets were incubated with recombinant podoplanin at different doses for different time at  $37^\circ\text{C}$ . After removing platelets with centrifugation, the complement inhibitor in the supernatant was measured with ELISA assays. Data are mean  $\pm$  sd.  $n = 6$  mice/group. Data were representative of three independent experiments.

### Supplemental Fig. 13

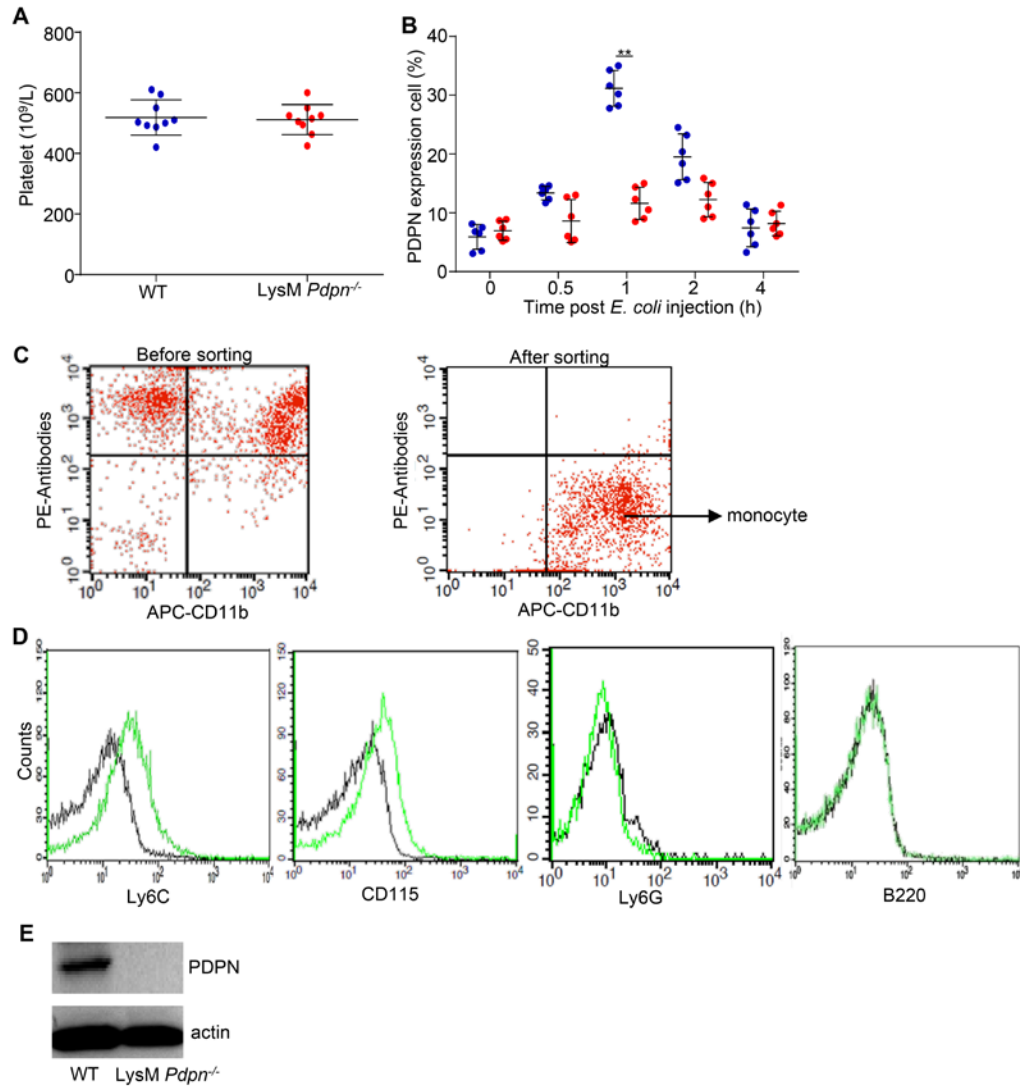

### Supplemental Figure 13. Deficiency of myeloid cell podoplanin abolishes *E. coli*-induced

### podoplanin expression on monocytes but not affects platelet count. (A) Peripheral blood

from WT and *LysM Pdpn*<sup>-/-</sup> mice was collected, and platelet count was measured with

Hemavet<sup>®</sup>. n = 9 mice/group. Data were analyzed using an unpaired Student's t test and were

representative of four independent experiments. (B) WT and *LysM Pdpn*<sup>-/-</sup> mice were injected

i.p. with a half lethal dose of *E. coli* ( $2 \times 10^7$  CFU/mouse). Peripheral blood was collected from

mice at different time points post *E. coli* infection. Podoplanin expression on monocytes was

analyzed with flow cytometry. Data represent mean  $\pm$  sd. n = 6 mice/group,  $**P < 0.01$ . Data were analyzed using a one-way ANOVA followed by a Tukey's test for multiple groups and were representative of three independent experiments. (C - D). Primary murine monocytes were purified using flow cytometry with PE-labeled antibodies recognizing CD90, B220, CD49b, NK1.1, Ly-6G surface markers, and an APC-labeled anti-CD11b antibody. The purified monocytes were defined as the PE-negative and APC-positive population. (E) Western blot to probe podoplanin in the lysates of WT and LysM *Pdpr*<sup>-/-</sup> monocytes. Represent data of three independent experiments was presented. Data were representative of three independent experiments.

**Supplemental Fig. 14**

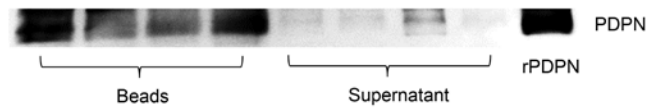

**Supplemental Figure 14. Protein A/G incubation removes recombinant podoplanin from the platelet supernatant.** WT platelets were isolated and resuspended in Tyrode's buffer at a concentration of  $1 \times 10^5/\mu\text{l}$ . Platelets were incubated with recombinant podoplanin (Fc chimera protein,  $10 \mu\text{g/ml}$ ) for 2 h at  $37^\circ\text{C}$ . After spinning down platelets, the supernatant was incubated with protein A/G beads at RT for 1 h. Then the beads were separated from the supernatant by centrifugation. The remained supernatant and the beads were applied on SAS-PAGE gel and the podoplanin was detected by western blot. The representative blot result of three independent experiments was shown. Data were representative of three independent experiments.

**Supplemental Fig. 15**

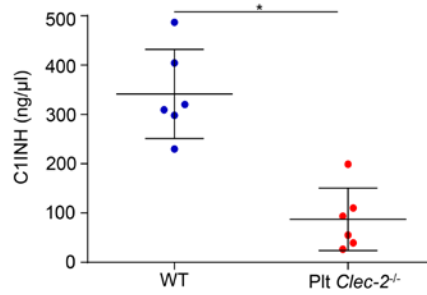

**Supplemental Figure 15. Measurement of complement inhibitors in the supernatant before the rescue assay.** To protect liver function, complement inhibitors were generated by incubating platelets ( $1 \times 10^5/\mu\text{l}$  in Tyrode's buffer) from WT and Plt *Clec-2*<sup>-/-</sup> mice with recombinant podoplanin (Fc chimera protein, 10  $\mu\text{g}/\text{ml}$ ) for 2 h at 37°C. After removing platelets and soluble podoplanin, complement inhibitors in the supernatant before the rescue assay was measured with an ELISA assay. Data represent mean  $\pm$  sd. n = 6 mice/group, \* $P < 0.05$ . Data were analyzed using an unpaired Student's t test and were representative of four independent experiments.
